# Supplementary material for: Crystal Structure of Procaspase-1 Zymogen Domain Reveals Insight into Inflammatory Caspase Autoactivation
Source: PubMed Central journal article supplement — J Biol Chem. 2009 Mar 6;284(10):6546–53. doi: 10.1074/jbc.M806121200 (PMC2649088; doi:10.1074/jbc.m806121200), 2009-03-06

## Supporting Information

### Figure S1. Analysis of p35 crystals after X-ray data collection.

Lane 1 contains MW standards and lane 2 the procaspase-1 zymogen starting material. Three different crystals that were used for data collection were dissolved and separated on the same SDS-PAGE gel. These preparations are shown in lanes 3-5 and indicate that the protein is still intact.

### Supplemental Figure 1

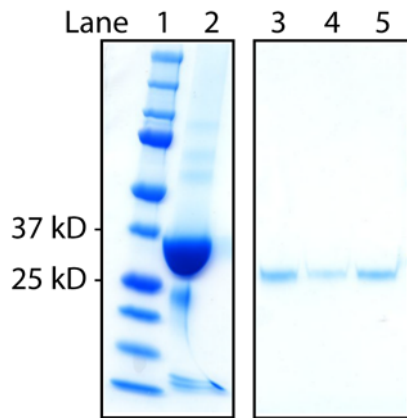

**Figure S2. Reactivity of caspase variants with an irreversible active-site inhibitor.**

(A) MS-TOF of processed caspase-1 reacted with the covalent inhibitor zVAD-FMK. The experimental mass is the same as the predicted mass of the p20 (19,845 Da) plus inhibitor (432 Da). (B) MS-TOF of p35 caspase-1 reacted with the covalent inhibitor zVAD-FMK. The experimental mass is within one Da of the theoretical mass of the p35 (35,907 Da) plus the inhibitor (432 Da).

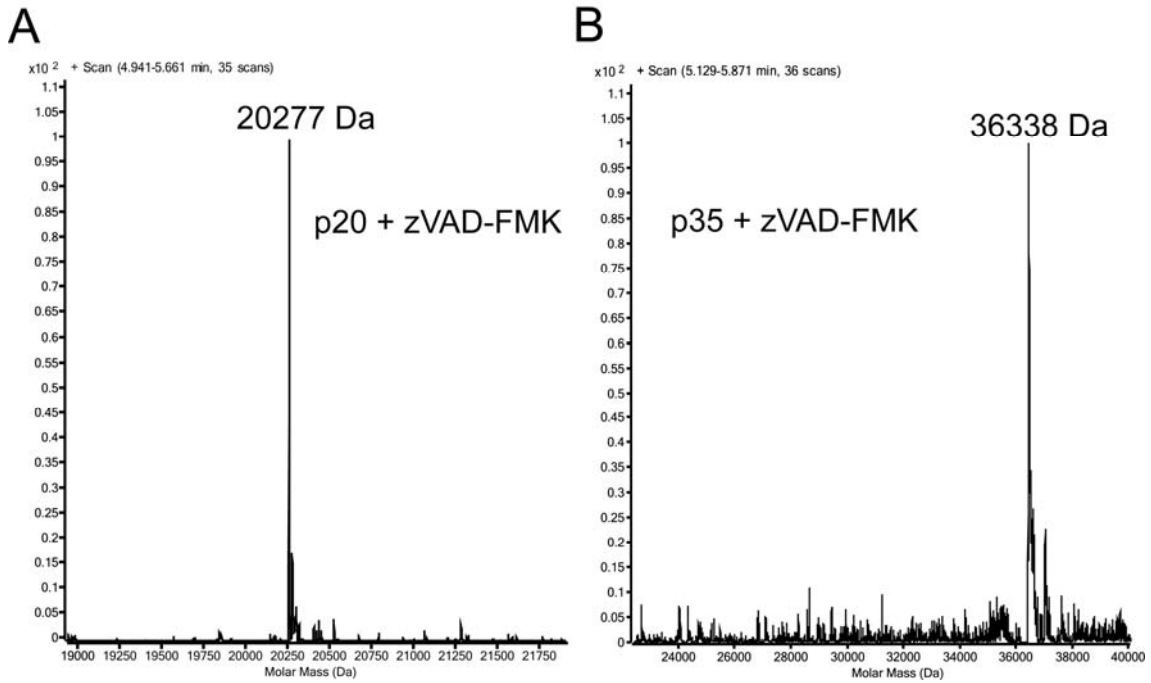

Supplement: M806121200_1.pdf [file M806121200_1.pdf]
